# Supplementary material for: Activation of KLF6 by titanate nanofibers and regulatory roles of KLF6 on ATF3 in the endothelial monolayer and mouse aortas
Source: Royal Society of Chemistry journal article supplement (doi:10.1039/d1mo00470k), 2022-12-20
Supplement: d1mo00470k1.pdf [file d1mo00470k1.pdf]

## Supporting information

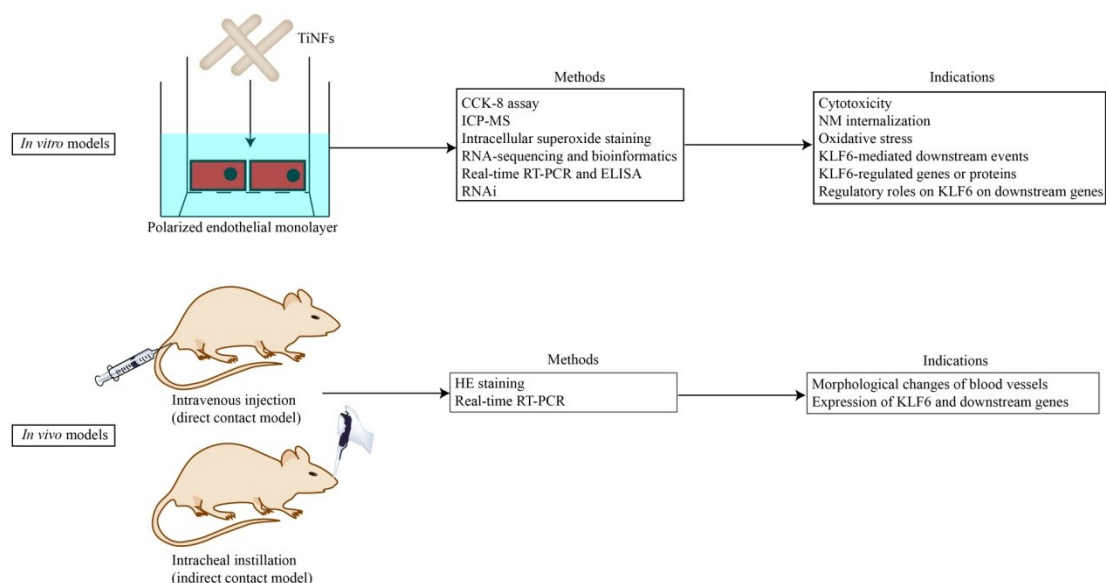

Figure S1. The schematic illustration of study design. This study used both *in vitro* models and *in vivo* models. The *in vitro* models were based on long-term cultivated HUVECs on cell culture inserts. The *in vivo* models were based on C57BL/6 mice, which were intravenously injected (direct contact model) or intratracheally instilled with TiNFs (indirect contact model). The experiments carried out on each model and the indications for each experiment were indicated in Figure S1. For more information, see the main text.

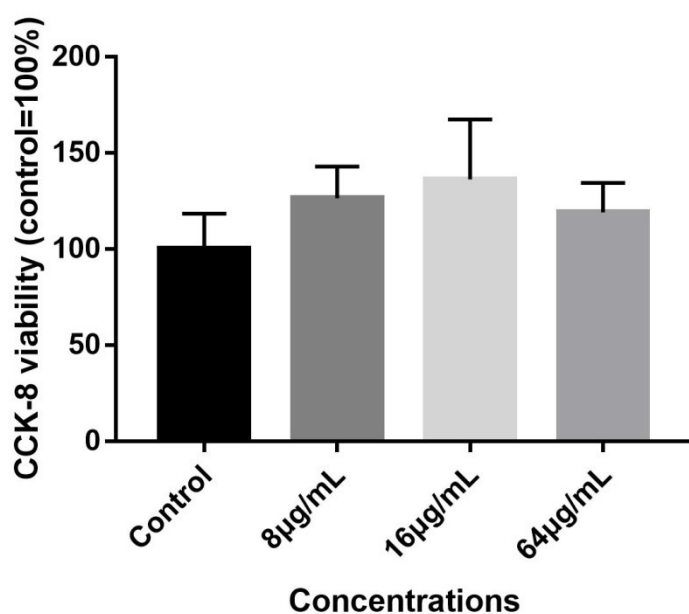

Figure S2. The changes of cellular viability. HUVECs grown in cell culture inserts were exposed to various concentrations of TiNFs for 24 h, and then the cellular viability was measured by CCK-8 assay.

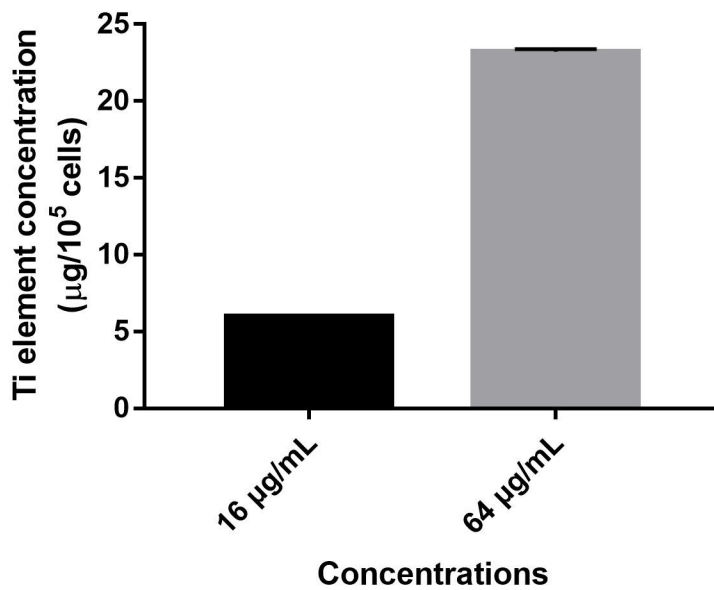

Figure S3. The increase of intracellular Ti element concentration. HUVECs grown in cell culture inserts were exposed to 16 or 64 µg/mL TiNFs for 24 h, and Ti elemental concentrations were measured by ICP-MS.

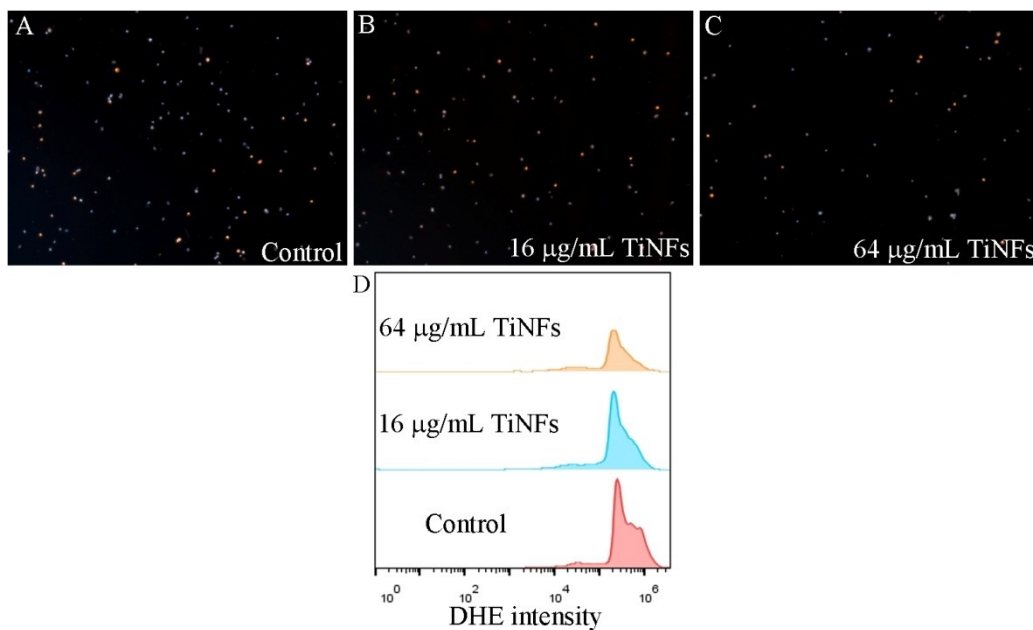

Figure S4. The changes of intracellular superoxide. HUVECs grown in cell culture inserts were incubated with 0 (S4A), 16 (S4B) or 64 µg/mL (S4C) TiNFs for 24 h. After the exposure, the cells were removed from cell culture inserts by using trypsin and counterstained by DHE (orange fluorescence, to stain superoxide) and Hoechst 33342 (blue fluorescence, to stain nuclei). The changes of DHE intensity were shown in Figure S4D.

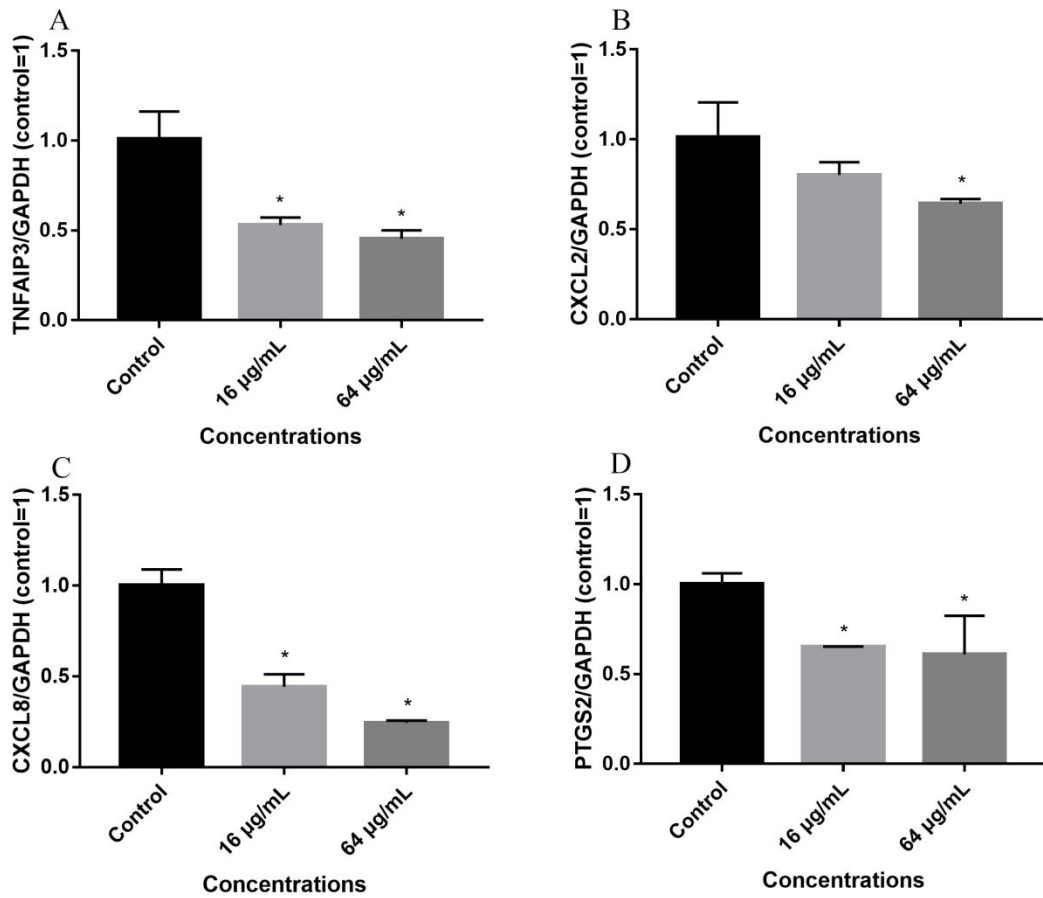

Figure S5. The mRNA levels of TNFAIP3 (S5A), CXCL2 (S5B), CXCL8 (S5C) and PTGS2 (S5D). HUVECs grown in cell culture inserts were exposed to various concentrations of TiNFs for 24 h, and the expression of KLF-related genes was measured by real-time RT-PCR. \*,  $p < 0.05$ , compared with control.

Table S1. The forward and reverse primers used for real-time RT-PCR (for *in vitro* studies).

| Gene names | Forward primers         | Reverse primers         |
|------------|-------------------------|-------------------------|
| GAPDH      | ACAGCCTCAAGATCATCAGC    | GGTCATGAGTCCTTCCACGAT   |
| ATF3       | AAAACCAGGATGCCACCGTT    | CCACATCCCCTACGAGTGACA   |
| KLF6       | CCCACGGCCAAGTTTACCTC    | AAGGCTTTTCTCCTGGCTTCC   |
| CCL2       | CCTAGCTTTCCCCAGACACC    | AAAAGCAATTTCCCCAAGTCTC  |
| TNFAIP3    | TCCTCAGGCTTTGTATTTGAGC  | TGTGTATCGGTGCATGGTTTTC  |
| CXCL2      | GTCTCAACCCCGCATCG       | TCAGTTGGATTGCCATTTT     |
| CXCL8      | CCAAGGGCCAAGAGAATATCGAA | AAATAAAGGAGAAACCAAGCACA |
| PTGS2      | CTCTATCACTGGCATCCCCTT   | CATTCCTACCACCAGCAACCC   |

Table S2. The forward and reverse primers used for real-time RT-PCR (for *in vivo* studies).

| Gene names | Forward primers                  | Reverse primers                 |
|------------|----------------------------------|---------------------------------|
| gapdh      | CGACTTCAACAGCAACTCCC<br>ACTCTTCC | TGGGTGGTCCAGGGTTTCTT<br>ACTCCTT |
| klf6       | CTGCAGGAAAGTTTACACGA<br>AA       | GTCAACTCATCACTTCTTGC<br>AA      |
| atf3       | GAGGATTTTGCTAACCTGAC<br>ACC      | GAGGATTTTGCTAACCTGA<br>CACC     |
| ccl2       | TTTTTGTCACCAAGCTCAAG<br>AG       | TTCTGATCTCATTTGGTTCC<br>GA      |

Table S3. The KLF6 siRNA sequences used in this study.

|                   | Sense (5'-3')                                    | Antisense (5'-3')                                      |
|-------------------|--------------------------------------------------|--------------------------------------------------------|
| KLF6<br>siRNA-287 | GmsUmsUmAmCfAmAfCfUfU<br>mAmGmAmGmAmCmCmAm<br>Am | UmsUfsGmGmUmCfUmCfUfAmA<br>mGmUmUfGmUfAmAmCmsAms<br>Am |
| KLF6<br>siRNA-621 | CmsAmsGmGmAfAmAfGfUfU<br>mUmAmCmAmCmCmAmAm<br>Am | UmsUfsUmGmGmUfGmUfAfAm<br>AmCmUmUfUmCfCmUmGmsCm<br>sAm |

Note: The modifications: m means the modifications with methoxy groups at 2', f means the modifications with F groups at 2'; and s means thiophosphate groups between the bases.

Table S4. The complete list of KLF6-related genes. HUVECs grown in cell culture inserts were exposed to 64  $\mu\text{g}/\text{mL}$  TiNFs for 24 h before analysis. Data were average FPKM values  $\pm$  SD of triplicate.

| Gene name | Control          | TiNFs             | Regulation | log <sub>2</sub> (fc) | P value | Significant |
|-----------|------------------|-------------------|------------|-----------------------|---------|-------------|
| CCL2      | 5.40 $\pm$ 0.38  | 29.88 $\pm$ 0.40  | up         | 2.47                  | 0.00    | yes         |
| PTGS2     | 8.61 $\pm$ 1.33  | 59.25 $\pm$ 14.76 | up         | 2.78                  | 0.00    | yes         |
| CXCL2     | 1.08 $\pm$ 0.12  | 8.04 $\pm$ 0.94   | up         | 2.89                  | 0.00    | yes         |
| ATF3      | 0.26 $\pm$ 0.14  | 2.93 $\pm$ 0.44   | up         | 3.51                  | 0.00    | yes         |
| CXCL8     | 34.58 $\pm$ 1.70 | 93.60 $\pm$ 25.92 | up         | 1.44                  | 0.00    | yes         |
| TNFAIP3   | 0.94 $\pm$ 0.03  | 3.32 $\pm$ 0.61   | up         | 1.82                  | 0.00    | yes         |
| KLF4      | 0.55 $\pm$ 0.22  | 2.32 $\pm$ 0.44   | up         | 2.07                  | 0.00    | yes         |
| MKI67     | 21.03 $\pm$ 2.71 | 10.69 $\pm$ 2.80  | down       | -0.98                 | 0.00    | no          |
| NFKB2     | 3.93 $\pm$ 0.06  | 6.71 $\pm$ 0.70   | up         | 0.77                  | 0.00    | no          |
| PLAU      | 10.72 $\pm$ 0.47 | 16.85 $\pm$ 0.36  | up         | 0.65                  | 0.00    | no          |
| NR2F1     | 14.00 $\pm$ 0.39 | 8.61 $\pm$ 0.99   | down       | -0.70                 | 0.00    | no          |
| TNIP1     | 12.68 $\pm$ 0.27 | 19.57 $\pm$ 2.26  | up         | 0.63                  | 0.00    | no          |
| PCNA      | 59.84 $\pm$ 3.96 | 38.65 $\pm$ 3.73  | down       | -0.63                 | 0.00    | no          |
| JUN       | 47.10 $\pm$ 6.38 | 68.34 $\pm$ 3.81  | up         | 0.54                  | 0.00    | no          |

|          |             |             |      |       |      |    |
|----------|-------------|-------------|------|-------|------|----|
| NFKBIA   | 10.38±0.57  | 15.56±1.45  | up   | 0.58  | 0.00 | no |
| POLA2    | 5.39±0.70   | 3.48±0.07   | down | -0.63 | 0.00 | no |
| PMAIP1   | 2.83±0.45   | 5.27±1.39   | up   | 0.90  | 0.00 | no |
| E2F1     | 4.14±0.78   | 2.23±0.39   | down | -0.89 | 0.00 | no |
| TGFBI    | 2.88±0.34   | 1.85±0.15   | down | -0.64 | 0.00 | no |
| BIRC5    | 4.11±1.02   | 2.55±0.24   | down | -0.69 | 0.01 | no |
| MNT      | 2.53±0.11   | 3.43±0.25   | up   | 0.44  | 0.01 | no |
| SDC1     | 4.78±0.72   | 3.16±0.41   | down | -0.60 | 0.01 | no |
| TFPI2    | 27.04±5.28  | 36.17±7.65  | up   | 0.42  | 0.03 | no |
| MAX      | 9.89±0.61   | 12.40±0.66  | up   | 0.33  | 0.03 | no |
| VEGFA    | 1.23±0.20   | 1.62±0.19   | up   | 0.40  | 0.04 | no |
| RELA     | 9.91±0.19   | 12.54±2.13  | up   | 0.34  | 0.04 | no |
| KLF6     | 14.76±12.21 | 29.96±20.21 | up   | 1.02  | 0.05 | no |
| IL6      | 2.00±0.22   | 2.96±0.70   | up   | 0.57  | 0.05 | no |
| CDK2     | 4.62±0.60   | 3.41±0.47   | down | -0.44 | 0.06 | no |
| MCL1     | 57.76±5.89  | 69.17±5.86  | up   | 0.26  | 0.07 | no |
| NR1D1    | 3.14±0.37   | 4.18±0.52   | up   | 0.41  | 0.08 | no |
| NSD1     | 6.48±1.05   | 7.65±0.12   | up   | 0.24  | 0.11 | no |
| NFKB1    | 8.63±0.07   | 10.12±0.33  | up   | 0.23  | 0.11 | no |
| BCL6     | 2.61±0.15   | 3.18±0.15   | up   | 0.29  | 0.12 | no |
| SP1      | 9.79±1.53   | 11.61±0.88  | up   | 0.25  | 0.12 | no |
| TAF9     | 16.61±0.93  | 13.67±1.30  | down | -0.28 | 0.13 | no |
| GSK3B    | 11.20±0.62  | 12.93±0.49  | up   | 0.21  | 0.14 | no |
| IGF1R    | 5.59±0.29   | 6.47±0.56   | up   | 0.21  | 0.15 | no |
| FBL      | 59.43±1.49  | 50.55±2.53  | down | -0.23 | 0.15 | no |
| NOP56    | 24.74±0.94  | 21.13±1.37  | down | -0.23 | 0.17 | no |
| CTNNB1   | 36.33±1.47  | 41.09±0.67  | up   | 0.18  | 0.17 | no |
| CREBBP   | 4.66±0.68   | 5.29±0.26   | up   | 0.18  | 0.22 | no |
| TNIP2    | 10.82±1.17  | 12.47±1.72  | up   | 0.21  | 0.23 | no |
| HDAC3    | 9.65±0.83   | 8.09±1.79   | down | -0.26 | 0.23 | no |
| BAX      | 30.51±1.63  | 26.73±0.40  | down | -0.19 | 0.27 | no |
| BCL2L11  | 1.24±0.19   | 1.60±0.86   | up   | 0.37  | 0.30 | no |
| SERPINH1 | 67.01±6.39  | 59.11±6.00  | down | -0.18 | 0.31 | no |
| TP53     | 14.32±3.94  | 16.64±5.57  | up   | 0.22  | 0.36 | no |
| NUFIP1   | 3.28±0.23   | 2.78±0.46   | down | -0.24 | 0.36 | no |
| NR2F6    | 6.34±0.66   | 5.47±0.52   | down | -0.21 | 0.36 | no |
| NFKBIE   | 5.49±0.23   | 6.14±0.17   | up   | 0.16  | 0.37 | no |
| HDAC1    | 21.36±1.67  | 19.08±1.76  | down | -0.16 | 0.38 | no |
| NR1H2    | 7.00±0.29   | 7.64±0.32   | up   | 0.13  | 0.38 | no |
| TRIM25   | 15.95±1.14  | 17.22±0.81  | up   | 0.11  | 0.38 | no |
| NFKBIZ   | 2.03±0.66   | 2.35±0.10   | up   | 0.21  | 0.40 | no |
| SIN3B    | 10.10±0.48  | 10.89±0.59  | up   | 0.11  | 0.40 | no |
| TGFBR1   | 2.24±0.05   | 2.52±0.60   | up   | 0.17  | 0.41 | no |

|          |              |              |      |        |      |    |
|----------|--------------|--------------|------|--------|------|----|
| CDKN1A   | 61.75±7.48   | 75.70±47.59  | up   | 0.29   | 0.42 | no |
| SIN3A    | 4.42±0.01    | 4.77±0.37    | up   | 0.11   | 0.42 | no |
| PARP16   | 1.22±0.10    | 1.40±0.10    | up   | 0.19   | 0.46 | no |
| RAC1     | 97.17±2.13   | 102.74±4.36  | up   | 0.08   | 0.49 | no |
| ENG      | 196.11±21.26 | 179.55±14.65 | down | -0.13  | 0.50 | no |
| NFKBIB   | 6.70±2.09    | 7.48±1.82    | up   | 0.16   | 0.51 | no |
| CDH2     | 9.06±1.49    | 8.21±0.70    | down | -0.14  | 0.51 | no |
| HRAS     | 17.27±1.03   | 15.71±1.87   | down | -0.14  | 0.53 | no |
| LCOR     | 1.38±0.31    | 1.50±0.41    | up   | 0.12   | 0.54 | no |
| CCND1    | 61.99±3.15   | 65.01±5.03   | up   | 0.07   | 0.56 | no |
| MDM2     | 15.71±1.00   | 16.48±1.48   | up   | 0.07   | 0.56 | no |
| PNO1     | 10.71±0.78   | 9.85±1.31    | down | -0.12  | 0.58 | no |
| BCL2L1   | 24.80±0.82   | 21.73±10.46  | down | -0.19  | 0.58 | no |
| PDCD1LG2 | 3.41±0.427   | 3.07±0.20    | down | -0.15  | 0.61 | no |
| RARB     | 11.78±1.20   | 12.37±1.86   | up   | 0.07   | 0.62 | no |
| RARG     | 2.27±0.30    | 2.09±0.04    | down | -0.12  | 0.69 | no |
| MYC      | 14.32±6.44   | 16.82±13.35  | up   | 0.23   | 0.69 | no |
| EHMT2    | 7.00±0.33    | 7.20±0.60    | up   | 0.04   | 0.71 | no |
| CDKN1B   | 13.27±0.30   | 13.67±1.32   | up   | 0.04   | 0.72 | no |
| APP      | 317.06±42.02 | 320.62±22.38 | up   | 0.02   | 0.82 | no |
| BAK1     | 16.47±1.64   | 15.81±0.67   | down | -0.06  | 0.83 | no |
| CYP1A1   | 14.44±1.14   | 14.54±1.36   | up   | 0.01   | 0.85 | no |
| CDK4     | 41.54±5.44   | 40.16±1.40   | down | -0.05  | 0.86 | no |
| ESRRA    | 5.97±0.47    | 5.70±1.76    | down | -0.07  | 0.86 | no |
| RB1      | 9.85±1.34    | 9.56±0.31    | down | -0.04  | 0.89 | no |
| NCOA1    | 3.57±0.23    | 3.57±0.12    | up   | 0.001  | 0.90 | no |
| PTEN     | 5.70±0.39    | 5.67±0.65    | down | -0.01  | 0.95 | no |
| NFKBIL1  | 6.23±0.82    | 6.21±0.52    | down | -0.005 | 0.95 | no |
| KAT2B    | 2.75±0.13    | 2.72±0.47    | down | -0.02  | 0.98 | no |
| SRSF2    | 13.87±1.03   | 13.70±2.23   | down | -0.02  | 0.99 | no |
| GTF3C1   | 14.23±1.03   | 14.01±1.38   | down | -0.02  | 0.99 | no |

Table S5. The genes which interact with KLF6 (Node1). According to STRING analysis, totally 17 genes (Node2) directly interact with KLF6.

| Node2    | Co-expression | Experimentally determined interaction | Automated text mining | Combined score |
|----------|---------------|---------------------------------------|-----------------------|----------------|
| JUN      | 0.785         | 0.101                                 | 0.685                 | 0.934          |
| SP1      | 0             | 0.846                                 | 0.874                 | 0.878          |
| ATF3     | 0.689         | 0.062                                 | 0.55                  | 0.857          |
| LCOR     | 0             | 0.281                                 | 0.65                  | 0.738          |
| TP53     | 0             | 0.226                                 | 0.644                 | 0.713          |
| SERPINH1 | 0             | 0.056                                 | 0.572                 | 0.578          |
| CCND1    | 0             | 0.056                                 | 0.534                 | 0.541          |

|        |       |       |       |       |
|--------|-------|-------|-------|-------|
| PMAIP1 | 0.053 | 0.058 | 0.526 | 0.54  |
| PTEN   | 0.053 | 0.059 | 0.498 | 0.514 |
| NFKBIA | 0.171 | 0.298 | 0.218 | 0.505 |
| RELA   | 0.062 | 0.281 | 0.256 | 0.455 |
| HDAC3  | 0     | 0.345 | 0.201 | 0.454 |
| MYC    | 0.102 | 0.058 | 0.402 | 0.45  |
| CXCL8  | 0.098 | 0.27  | 0.229 | 0.447 |
| KLF4   | 0.119 | 0.27  | 0.73  | 0.417 |
| CDKN1A | 0.085 | 0.058 | 0.37  | 0.409 |
| CCL2   | 0.052 | 0.27  | 0.212 | 0.407 |
